# Supplementary material for: Chronic Exposure to TDI Induces Cell Migration and Invasion via TGF-β1 Signal Transduction
Source: MDPI journal article supplement (doi:10.3390/ijms24076157), 2023-03-24
Supplement: s1 [file s1]

**Supplementary Table S1. Total RNA quality used for mRNA quantification sequencing.**

| Sample | ng/ $\mu$ l | Total ( $\mu$ g) | OD value 260/280 | OD value 260/230 | Ratio 28s/18s | RIN |
|--------|-------------|------------------|------------------|------------------|---------------|-----|
| Con    | 436.5       | 13.967           | 2.05             | 2.14             | 1.9           | 9.7 |
| TDI50  | 349.8       | 11.194           | 2.08             | 1.89             | 2.0           | 9.7 |
| TDI250 | 310.0       | 9.920            | 2.11             | 2.02             | 2.2           | 9.7 |

**Supplementary Table S2. Primer sequence used for qRT-PCR.**

| Genes                                                     | Forward primers               | Reverse primers              | Product size |
|-----------------------------------------------------------|-------------------------------|------------------------------|--------------|
| <i>Vimentin</i><br>( <i>homo sapiens</i> )                | 5'-AGGCAAAGCAGGAGTCCACTGA-3'  | 5'-ATCTGGCGTTCCAGGGACTCAT-3' | 100bp        |
| <i>Fibronectin</i><br>( <i>homo sapiens</i> )             | 5'-ACAACACCGAGGTGACTGAGAC-3'  | 5'-GGACACAACGATGCTTCCTGAG-3' | 143bp        |
| $\alpha$ -SMA<br>( <i>homo sapiens</i> )                  | 5'-CCATCGTCCACCGCAAAT-3'      | 5'-TGAGAAGATTCGTCGTCCTG-3'   | 75bp         |
| <i>E-cadherin</i><br>( <i>homo sapiens</i> )              | 5'-TATTGAAAGAGAAACAGGATGG-3'  | 5'-CGTGAGAGAAGAGAGTGTAT-3'   | 83bp         |
| <i>N-cadherin</i><br>( <i>homo sapiens</i> )              | 5'-CCTCCAGAGTTTACTGCCATGAC-3' | 5'-GTAGGATCTCCGCCACTGATTC-3' | 149bp        |
| <i>TGF-<math>\beta</math>1</i><br>( <i>homo sapiens</i> ) | 5'-CTATGACAAGTTCAAGCAGAG-3'   | 5'-GAGGTATCGCCAGGAATT-3'     | 187bp        |
| <i>TGFBR1</i><br>( <i>homo sapiens</i> )                  | 5'-GTGCCTTGAGTTGGTGTA-3'      | 5'-ATGGGATAGTGATTTTGTGTG-3'  | 195bp        |
| <i>TGFBR2</i><br>( <i>homo sapiens</i> )                  | 5'-TGAAGAACGACCTAACCT-3'      | 5'-TCATCCACAGACAGAGTAG-3'    | 76bp         |
| <i>GAPDH</i><br>( <i>homo sapiens</i> )                   | 5'-TATGACAACAGCCTCAAGAT-3'    | 5'-GAGTCCTTCCACGATACC-3'     | 105bp        |

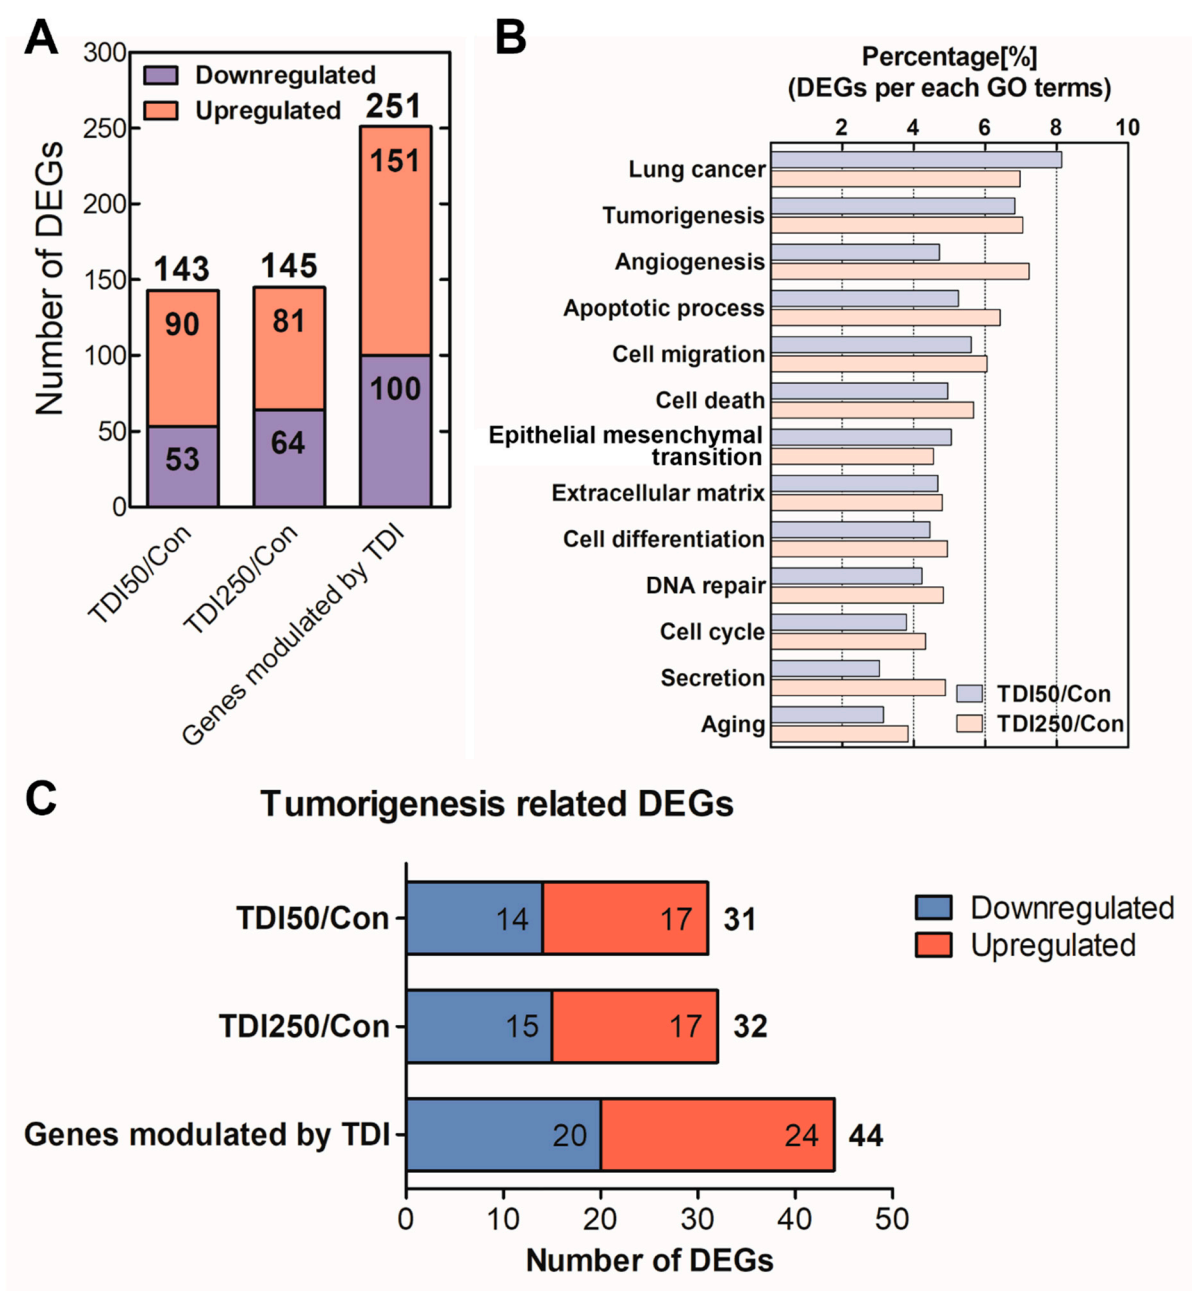

**Supplementary Figure S1. Selection of gene modulated by TDI exposure in BEAS-2B**

(A) After exposure to 50  $\mu$ M and 250  $\mu$ M of TDI for 24 hours, we selected the differentially expressed genes (DEGs) whose expression values were modified by  $\geq 2$  folds compared to the control, and a  $\log_2$ -normalized value of genes were 5 or over to minimize false counts. (B) Gene ontology analysis was conducted using 251 DEGs modulated by TDI. (C) Among genes related to tumorigenesis, 44 DEGs were significantly modulated by TDI. The expression of 44 DEGs were altered by  $\geq 1.4$  folds compared to the control, and a  $\log_2$ -normalized value of genes was 5 or over to minimize false counts. TDI250: 250  $\mu$ M of TDI; TDI50: 50  $\mu$ M of TDI; Con: control.

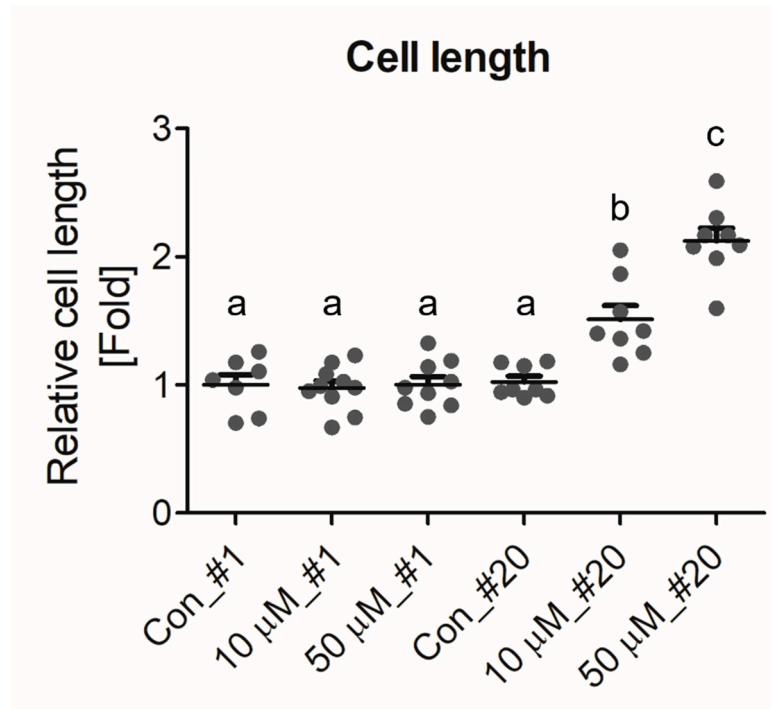

**Supplementary Figure S2. Cell length altered by chronic TDI exposure**

The relative cell length of the TDI-exposed cell was represented through the plot. Cell lengths were measured through ImageJ using more than ten cells. a, b, and c represent groups with the statistically same tendency, respectively. Different groups show a significance of  $p < 0.001$  when compared to each other. #1: TDI 1 time treatment group; #20: TDI 20 times treatment group; Con: control.
